# Supplementary material
Source: MDPI journal article supplement (https://www.mdpi.com/2073-4395/12/5/1106)
Supplement: s1 [file s1]

## Supplementary Materials

**Table S1.** Analysis of influences of different fertilizer applications on soil organic carbon fractions, properties of soil and plant, and gas emission based on omega squared ( $\omega^2$ ) from ANOVA model.

| Variable                          | F     | <i>p</i> | $\omega^2$ |
|-----------------------------------|-------|----------|------------|
| LOIC                              | 9.26  | <0.001   | 0.71       |
| WBC                               | 0.51  | 0.813    | -0.17      |
| POXC                              | 1.07  | 0.424    | 0.02       |
| PMC                               | 2.15  | 0.097    | 0.25       |
| MBC                               | 7.41  | <0.001   | 0.65       |
| BD                                | 16.08 | <0.001   | 0.81       |
| pH                                | 1.60  | 0.205    | 0.15       |
| EC                                | 1.25  | 0.332    | 0.07       |
| CEC                               | 1.32  | 0.303    | 0.08       |
| Ex. Ca                            | 1.14  | 0.387    | 0.04       |
| Ex. K                             | 2.37  | 0.073    | 0.28       |
| Ex. Mg                            | 0.27  | 0.955    | -0.27      |
| Av. P <sub>2</sub> O <sub>5</sub> | 2.30  | 0.080    | 0.27       |
| T-N                               | 3.45  | 0.019    | 0.42       |
| FW                                | 4.93  | 0.004    | 0.53       |
| Chlorophyll                       | 0.57  | 0.766    | -0.14      |
| Carotenoid                        | 0.65  | 0.712    | -0.11      |
| Plant N                           | 1.51  | 0.232    | 0.13       |
| CO <sub>2</sub>                   | 15.51 | <0.001   | 0.81       |
| N <sub>2</sub> O                  | 4.99  | 0.004    | 0.54       |

LOIC, loss-on-ignition carbon; WBC, Walkley-Black carbon; POXC, permanganate oxidizable carbon; PMC, potentially mineralizable C; MBC, microbial biomass carbon; BD, bulk density; EC, electrical conductivity; CEC, cation exchangeable capacity; Ex. Ca, K, and Mg, exchangeable calcium, potassium, and magnesium; Av. P<sub>2</sub>O<sub>5</sub>, available phosphorus; T-N, total nitrogen; FW, fresh weight.

**Table S2.** Relationship of linear regression between soil organic C fractions and variables of soil, plant, GHGs (R-sq: %; \* $p < 0.05$ , \*\* $p < 0.01$ , \*\*\* $p < 0.001$ , <sup>ns</sup> $p > 0.05$ ). The largest R<sup>2</sup> value in each row is indicated in bold.

| Variable                          | LOIC              | WBC                | POXC               | PMC                 | MBC                |
|-----------------------------------|-------------------|--------------------|--------------------|---------------------|--------------------|
| <i>Soil</i>                       |                   |                    |                    |                     |                    |
| BD                                | <b>16.6*</b>      | 0.9 <sup>ns</sup>  | 0.5 <sup>ns</sup>  | < 0.1 <sup>ns</sup> | 3.2 <sup>ns</sup>  |
| pH                                | 1.5 <sup>ns</sup> | 2.4 <sup>ns</sup>  | 5.6 <sup>ns</sup>  | 4.8 <sup>ns</sup>   | <b>20.0*</b>       |
| T-N                               | 45.5***           | 29.0**             | <b>50.3***</b>     | 0.2 <sup>ns</sup>   | 36.0**             |
| Av. P <sub>2</sub> O <sub>5</sub> | <b>22.3*</b>      | 20.4*              | 14.5 <sup>ns</sup> | 1.6 <sup>ns</sup>   | 13.3 <sup>ns</sup> |
| Ex. Ca                            | 9.7 <sup>ns</sup> | 3.8 <sup>ns</sup>  | 25.1*              | 0.1 <sup>ns</sup>   | <b>26.9**</b>      |
| Ex. K                             | <b>32.9**</b>     | 12.5 <sup>ns</sup> | 8.1 <sup>ns</sup>  | 6.0 <sup>ns</sup>   | 2.8 <sup>ns</sup>  |
| Ex. Mg                            | 9.3 <sup>ns</sup> | 1.9 <sup>ns</sup>  | 11.7 <sup>ns</sup> | <b>16.4*</b>        | 2.3 <sup>ns</sup>  |
| MBC <sup>1</sup>                  | 22.7*             | 10.8 <sup>ns</sup> | <b>25.9*</b>       | < 0.1 <sup>ns</sup> | -                  |
| <i>Plant</i>                      |                   |                    |                    |                     |                    |
| FW                                | <b>60.8***</b>    | 17.1*              | 14.0 <sup>ns</sup> | 1.0 <sup>ns</sup>   | 22.4*              |
| N                                 | 17.6*             | 6.2 <sup>ns</sup>  | <b>19.3*</b>       | 11.8 <sup>ns</sup>  | 5.1 <sup>ns</sup>  |
| <i>GHG</i>                        |                   |                    |                    |                     |                    |
| CO <sub>2</sub>                   | 32.5**            | 11.3 <sup>ns</sup> | 30.4**             | 0.4 <sup>ns</sup>   | <b>49.0***</b>     |
| N <sub>2</sub> O                  | <b>22.8*</b>      | 7.0 <sup>ns</sup>  | 9.2 <sup>ns</sup>  | < 0.1 <sup>ns</sup> | 12.5 <sup>ns</sup> |

<sup>1</sup>Considered as a microbial abundance index. LOIC, loss-on-ignition carbon; WBC, Walkley-Black carbon; POXC, permanganate oxidizable carbon; PMC, po-tentially mineralizable C; MBC, microbial biomass carbon; BD, bulk density; T-N, total nitrogen; Av. P<sub>2</sub>O<sub>5</sub>, available phosphorus; Ex. Ca, K, and Mg, exchangeable calcium, potassium, and magnesium; FW, fresh weight; GHG, greenhouse gas.
